# Supplementary material for: Osteocytic Connexin Hemichannels Modulate Oxidative Bone Microenvironment and Breast Cancer Growth
Source: MDPI journal article supplement (doi:10.3390/cancers13246343), 2021-12-17

### **Supplemental Figure Legends**

**Figure S1. Cx43 expression in Py8119 and MLO-Y4 cells.** Crude membrane extracts of Py8119 and MLO-Y4 cells were immunoblotted using anti-Cx43 antibody.

# Figure S1

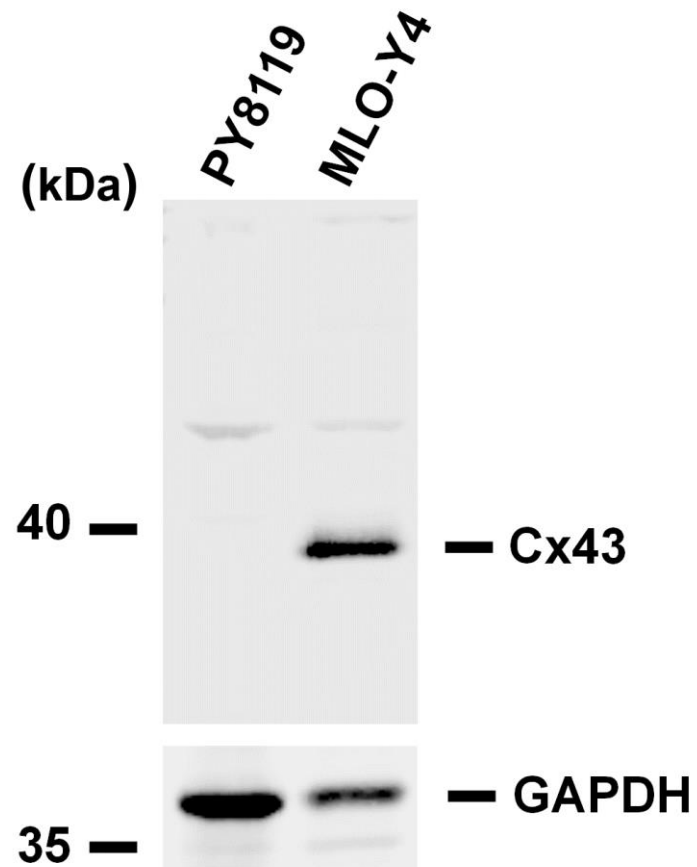

Supplement: s1 [file s1]
